# Supplementary material for: Management of Enterococcal Catheter-associated Bloodstream Infections in Patients with Cancer
Source: Research Square preprint supplement (doi:10.21203/rs.3.rs-151984/v1), 2021-02-12
Supplement: Supplementary file 1 [file 58a9f8c8f472cf9485bee913.xlsx]

## Sheet: Sheet1
Table 1. Characteristics and outcomes among different groups.
Variables	CLABSI with MBI (G1)	CRBSI and CLABSI without MBI (G2)	Non-CLABSI (G3)	p-value	Pairwise comparisons with significant differences
	(n = 132)	(n = 101)	(n = 164)
	N (%)	N (%)	N (%)
Age (years), median (range)	58 (19 - 89)	57 (10 - 87)	58 (< 1 - 82)	0.95
Sex, male	90 (68)	64 (63)	91 (55)	0.08
Type of cancer				< .0001	G1 vs G2: p <.0001; G1 vs G3: p<.0001
Hematologic malignancy a	130 (98)	80 (79)	117 (71)
Solid tumor	2 (2)	21 (21)	47 (29)
Transplant	49 (37)	45 (45)	37/163 (23)	<.001	G1 vs G3: p=0.007; G2 vs G3: p<.001
Allo	46/49 (94)	42/45 (93)	33/37 (89)
Auto	3/49 (6)	3/45 (7)	4/37 (11)
Neutropenia (ANC<500)	127 (96)	15 (15)	85 (52)	< .0001	G1 vs G2: p <.0001; G1 vs G3: p<.0001; G2 vs G3: p<.0001
ICU admission	27 (20)	26 (26)	28 (17)	0.24
GVHD	6/131 (5)	6 (6)	10/159 (6)	0.81
Colonization with VRE at bacteremia	48/122 (39)	21/80 (26)	42/124 (34)	0.16
Enterococcus organism
E. Faecalis	41 (31)	63 (62)	75 (46)	< .0001	G1 vs G2; p<.0001; G1 vs G3: p=0.01; G2 vs G3: p=0.01
E. Faecium	85 (64)	37 (37)	78 (48)	< .0001	G1 vs G2: p<.0001; G1 vs G3: p=0.004
Other Enterococcus species b	6 (5)	1 (1)	11 (7)	0.09
VRE isolate	56/131 (43)	29/100 (29)	48 (29)	0.027	G1 vs G3: p=0.016;
Days between cvc insertion and positive culture ,	30 (16 - 91)	61 (17 - 125)	55 (21 - 177)	0.007	G1 vs G3: p=0.002
median (IQR)
Catheter management				0.004	G2 vs G3: p<.001
Removal	64 (48)	56 (55)	59 (36)
Lock therapy	2 (2)	3 (3)	1 (1)
Catheter retained (without lock therapy)	66 (50)	42 (42)	104 (63)
Catheter removal since positive blood culture c				0.008	G2 vs G3: p=0.003
< 3 days	29/130 (22)	32/98 (33)	32/163 (20)
3 - 7 days	31/130 (24)	22/98 (22)	23/163 (14)
> 7 days (including catheter retained)	70/130 (54)	44/98 (45)	108/163 (66)
Received Antibiotics	125 (95)	96 (95)	149 (91)	0.3
Duration of antibiotic therapy (days), median (IQR)	16 (11 - 22)	15 (9 - 18)	15 (10 - 22)	0.53
Complications within 3 months	7/130 (5)	8/98 (8)	6/155 (4)	0.34
All-cause mortality within 3 months	67 (51)	39 (39)	71 (43)	0.17
Infection-related mortality within 3 months	16/131 (12)	8/97 (8)	13/158 (8)	0.45
Recurrence within 3 months since microbiology	10/111 (9)	6/88 (7)	11/137 (8)	0.85
eradication d
Notes:
a Six patients with hematologic malignancy had solid tumor as well.
b Included E. Gallinarum, E. Casseliflavus and other Enterococcus spp unidetified.
c Patients with lock therapy were excluded from the analysis
d Patients without mocrobiological resolution and patients whose recurrence data were unkown were excluded in the analysis.
