# Supplementary material for: Management of Enterococcal Catheter-associated Bloodstream Infections in Patients with Cancer
Source: Research Square preprint supplement (doi:10.21203/rs.3.rs-151984/v1), 2021-02-12
Supplement: Supplementary file 2 [file a5d371b008031b99a0d21c65.xlsx]

## Sheet: Sheet1
Table 2. Effect of catheter amangement in different groups.
1) CLABSI with MBI
Outcome	Catheter removal e, f			p-value	Pairwise comparisons with significant differences
	< 3 Days	3 -7 Days	> 7 Days g
	(n = 23)	(n = 27)	(n = 60)
	N (%)	N (%)	N (%)
Final outcome h, I				0.004	"3-7 days" vs "> 7 days" : p=0.003
Success	18 (78)	18 (67)	56 (93)
Failure	5 (22)	9 (33)	4 (7)
2) CRBSI or CLABSI without MBI
Outcome	Catheter removal e, f			p-value	Pairwise comparisons with significant differences
	< 3 Days	3 -7 Days	> 7 Days g
	(n = 24)	(n = 19)	(n = 37)
	N (%)	N (%)	N (%)
Final outcome h, i				0.025	None (due to alpha adjustment for multiple comparisons)
Success	21 (88)	12 (63)	34 (92)
Failure	3 (13)	7 (37)	3 (8)
3) Non-CLABSI
Outcome	Catheter removal e, f			p-value	Pairwise comparisons with significant differences
	< 3 Days	3 -7 Days	> 7 Days g
	(n = 22)	(n = 19)	(n = 88)
	N (%)	N (%)	N (%)
Final outcome h, i				0.006	"< 3 days" vs "> 7 days": p=0.006
Success	14 (64)	14 (74)	79 (90)
Failure	8 (36)	5 (26)	9 (10)
Notes:
e Since positve blood culture.
f Patients with lock therapy were excluded from the analysis.
g Included patietns with catheter retained.
h This is a composite outcome. Success means that a patient had no infection-related complication
and no infection-related death within 3 months after bacteremia, as well as no infection-related
recurrence within 3 months after microbiological resolution.
i Patients who had no microbiological resoltuion, or who had missing data for infecton-related complication,
or infection-related death, or recurrence, or who died within 7 days after bacteremia were excluded
from the analysis.
